# Supplementary material
Source: PubMed Central journal article supplement (PMC8679120)
Supplement: NIHMS1759840-supplement-1.pdf [file NIHMS1759840-supplement-1.pdf]

**Supplemental materials:**

**Supplemental Table 1**

**Characteristics of 10,100 participant at Atherosclerosis Risk in Communities (ARIC) Study Visit 4 (1996-1998) and incidence rate (95% confidence interval) of dementia by categories of aspartate aminotransferase**

|                                         | <b>Aspartate aminotransferase (U/L)</b> |                                   |                             |                             |                             |                           |
|-----------------------------------------|-----------------------------------------|-----------------------------------|-----------------------------|-----------------------------|-----------------------------|---------------------------|
|                                         | <b>10th percentile (8-15)</b>           | <b>10-20th percentile (16-17)</b> | <b>2nd quintile (18-19)</b> | <b>3rd quintile (20-21)</b> | <b>4th quintile (22-26)</b> | <b>5th quintile (≥27)</b> |
| <b>N</b>                                | 672                                     | 1230                              | 1784                        | 1874                        | 2519                        | 2021                      |
| <b>Age, years, mean (SD)</b>            | 62.9 (5.8)                              | 62.7 (5.7)                        | 63.2 (5.6)                  | 63.7 (5.6)                  | 63.4 (5.6)                  | 63.1 (5.6)                |
| <b>Female, N (%)</b>                    | 439 (65.3)                              | 813 (66.1)                        | 1050 (58.9)                 | 1078 (57.5)                 | 1245 (49.4)                 | 928 (45.9)                |
| <b>Race-Center, N (%)</b>               |                                         |                                   |                             |                             |                             |                           |
| <b>NC/white</b>                         | 183 (27.2)                              | 320 (26.0)                        | 414 (23.2)                  | 410 (21.9)                  | 569 (22.6)                  | 390 (19.3)                |
| <b>NC/black</b>                         | 21 (3.1)                                | 35 (2.8)                          | 54 (3.0)                    | 43 (2.3)                    | 39 (1.5)                    | 34 (1.7)                  |
| <b>MI/black</b>                         | 200 (29.8)                              | 279 (22.7)                        | 353 (19.8)                  | 338 (18.0)                  | 414 (16.4)                  | 362 (17.9)                |
| <b>MN/white</b>                         | 87 (12.9)                               | 239 (19.4)                        | 451 (25.3)                  | 543 (29.0)                  | 819 (32.5)                  | 692 (34.2)                |
| <b>MD/white</b>                         | 181 (26.9)                              | 357 (29.0)                        | 512 (28.7)                  | 540 (28.8)                  | 678 (26.9)                  | 543 (26.9)                |
| <b>Education, N (%)</b>                 |                                         |                                   |                             |                             |                             |                           |
| <b>&lt;High school</b>                  | 182 (27.1)                              | 261 (21.2)                        | 352 (19.7)                  | 353 (18.8)                  | 436 (17.3)                  | 339 (16.8)                |
| <b>High school or vocational school</b> | 295 (43.9)                              | 509 (41.4)                        | 807 (45.2)                  | 783 (41.8)                  | 1033 (41.0)                 | 842 (41.7)                |

|                                                  |              |              |              |              |              |              |
|--------------------------------------------------|--------------|--------------|--------------|--------------|--------------|--------------|
| <b>College, graduate, or professional school</b> | 195 (29.0)   | 460 (37.4)   | 625 (35.0)   | 738 (39.4)   | 1050 (41.7)  | 840 (41.6)   |
| <b>APOE e4 status, N (%)</b>                     | 191 (28.4)   | 377 (30.7)   | 559 (31.3)   | 539 (28.8)   | 760 (30.2)   | 605 (29.9)   |
| <b>Alcohol Use, N (%)</b>                        |              |              |              |              |              |              |
| <b>Current</b>                                   | 250 (37.9)   | 535 (43.7)   | 837 (47.0)   | 913 (49.0)   | 1330 (53.1)  | 1102 (54.8)  |
| <b>Former</b>                                    | 252 (38.2)   | 396 (32.4)   | 557 (31.3)   | 537 (28.8)   | 708 (28.3)   | 562 (28.0)   |
| <b>Never</b>                                     | 158 (23.9)   | 293 (23.9)   | 386 (21.7)   | 414 (22.2)   | 468 (18.7)   | 346 (17.2)   |
| <b>Smoking, N (%)</b>                            |              |              |              |              |              |              |
| <b>Current</b>                                   | 184 (27.9)   | 265 (21.7)   | 308 (17.3)   | 246 (13.2)   | 250 (10.0)   | 211 (10.5)   |
| <b>Former</b>                                    | 242 (36.7)   | 468 (38.2)   | 722 (40.6)   | 826 (44.3)   | 1204 (48.0)  | 960 (47.8)   |
| <b>Never</b>                                     | 234 (35.5)   | 491 (40.1)   | 747 (42.0)   | 792 (42.5)   | 1053 (42.0)  | 839 (41.7)   |
| <b>BMI, kg/m2, mean (SD)</b>                     | 30.2 (6.6)   | 29.4 (6.1)   | 29.0 (5.5)   | 28.5 (5.5)   | 28.5 (5.2)   | 29.0 (5.4)   |
| <b>Underweight, N (%)</b>                        | 6 (0.9)      | 3 (0.2)      | 5 (0.3)      | 18 (1.0)     | 20 (0.8)     | 15 (0.7)     |
| <b>SBP, mmHg, mean (SD)</b>                      | 127.4 (20.2) | 127.4 (19.1) | 126.5 (18.6) | 127.6 (18.8) | 127.6 (18.7) | 128.2 (18.4) |
| <b>DBP, mmHg, mean (SD)</b>                      | 69.5 (11.2)  | 69.9 (10.5)  | 70.8 (9.9)   | 70.8 (10.2)  | 71.5 (9.9)   | 72.1 (10.4)  |
| <b>Hypertension, N (%)</b>                       | 353 (52.8)   | 565 (46.0)   | 826 (46.5)   | 878 (47.2)   | 1170 (46.6)  | 973 (48.3)   |
| <b>Total cholesterol, mmol/L, mean (SD)</b>      | 5.1 (0.9)    | 5.2 (0.9)    | 5.2 (0.9)    | 5.3 (1.0)    | 5.2 (1.0)    | 5.2 (1.0)    |

|                                    |                  |                 |                  |                  |                  |                  |
|------------------------------------|------------------|-----------------|------------------|------------------|------------------|------------------|
| <b>HDL, mmol/L, mean (SD)</b>      | 1.3 (0.4)        | 1.3 (0.4)       | 1.3 (0.4)        | 1.3 (0.4)        | 1.3 (0.4)        | 1.2 (0.4)        |
| <b>Diabetes, N (%)</b>             | 201 (30.1)       | 259 (21.1)      | 303 (17.0)       | 261 (14.0)       | 357 (14.2)       | 357 (17.8)       |
| <b>Hypoglycemia, N (%)</b>         | 2 (0.3)          | 3 (0.2)         | 3 (0.2)          | 2 (0.1)          | 7 (0.3)          | 6 (0.3)          |
| <b>Incidence rate of Dementia*</b> | 11.9 (10.1-14.1) | 10.4 (9.2-11.9) | 11.1 (10.0-12.3) | 12.3 (11.2-13.5) | 11.5 (10.6-12.5) | 12.0 (11.0-13.2) |

---

Values are Count (Proportion), mean (SD), or incidence rate (95% confidence interval)

Abbreviations: BMI, body mass index; SBP, systolic blood pressure; DBP, diastolic blood pressure; HDL, high-density lipoprotein cholesterol

Dementia was ascertained by an expert adjudication panel at scheduled visits, telephone or informant interviews, or ICD-9 codes

Underweight was defined as BMI <18.5 kg/m<sup>2</sup>. Hypoglycemia was defined as fasting glucose <70 mg/dL

\* Per 1,000 person-year, estimated by Poisson regression with continuous variables centered at the mean

**Supplemental Table 2**

**Subgroup hazard ratios (95% confidence interval) of incident dementia by categories of aspartate aminotransferase measured at Atherosclerosis Risk in Communities (ARIC) Study Visit 4**

**(N=10,100)**

|             | Aspartate aminotransferase (U/L) |                            |                      |                      |                      |                    | P value for interaction |
|-------------|----------------------------------|----------------------------|----------------------|----------------------|----------------------|--------------------|-------------------------|
|             | 10th percentile (8-15)           | 10-20th percentile (16-17) | 2nd quintile (18-19) | 3rd quintile (20-21) | 4th quintile (22-26) | 5th quintile (≥27) |                         |
| <b>Age</b>  |                                  |                            |                      |                      |                      |                    | 0.425                   |
| <65         | 1.08 (0.77-1.52)                 | 1.11 (0.85-1.44)           | 1 (Ref.)             | 0.96 (0.75-1.23)     | 0.85 (0.67-1.07)     | 0.98 (0.77-1.23)   |                         |
| ≥65         | 1.36 (1.04-1.79)*                | 1.00 (0.79-1.27)           | 1 (Ref.)             | 1.07 (0.88-1.30)     | 1.04 (0.87-1.25)     | 1.23 (1.01-1.49)*  |                         |
| <b>Sex</b>  |                                  |                            |                      |                      |                      |                    | 0.095                   |
| Male        | 1.61 (1.13-2.28)*                | 1.40 (1.05-1.87)*          | 1 (Ref.)             | 1.08 (0.85-1.38)     | 1.02 (0.82-1.28)     | 1.16 (0.92-1.46)   |                         |
| Female      | 1.07 (0.82-1.40)                 | 0.88 (0.71-1.11)           | 1 (Ref.)             | 0.96 (0.79-1.16)     | 0.92 (0.77-1.12)     | 1.11 (0.91-1.36)   |                         |
| <b>Race</b> |                                  |                            |                      |                      |                      |                    | 0.364                   |
| White       | 1.32 (1.02-1.71)*                | 1.03 (0.83-1.27)           | 1 (Ref.)             | 1.01 (0.84-1.20)     | 0.90 (0.76-1.06)     | 1.14 (0.96-1.35)   |                         |
| Black       | 1.10 (0.75-1.62)                 | 1.08 (0.78-1.49)           | 1 (Ref.)             | 1.06 (0.79-1.42)     | 1.15 (0.87-1.53)     | 1.08 (0.80-1.47)   |                         |
| <b>APOE</b> |                                  |                            |                      |                      |                      |                    | 0.838                   |
| No          | 1.15 (0.87-1.52)                 | 1.05 (0.83-1.34)           | 1 (Ref.)             | 1.06 (0.87-1.30)     | 1.01 (0.83-1.23)     | 1.14 (0.93-1.40)   |                         |
| Yes         | 1.31 (0.94-1.82)                 | 1.02 (0.78-1.33)           | 1 (Ref.)             | 0.95 (0.76-1.19)     | 0.89 (0.72-1.10)     | 1.12 (0.90-1.40)   |                         |

**Current alcohol use**

-

|     |                  |                  |          |                  |                  |                  |
|-----|------------------|------------------|----------|------------------|------------------|------------------|
| No  | 1.18 (0.92-1.52) | 0.91 (0.73-1.14) | 1 (Ref.) | 0.93 (0.77-1.12) | 0.89 (0.74-1.06) | 1.10 (0.90-1.33) |
| Yes | 1.26 (0.84-1.89) | 1.28 (0.96-1.72) | 1 (Ref.) | 1.16 (0.90-1.48) | 1.09 (0.87-1.38) | 1.21 (0.95-1.53) |

**Diabetes**

-

|     |                  |                  |          |                  |                  |                  |
|-----|------------------|------------------|----------|------------------|------------------|------------------|
| No  | 1.17 (0.90-1.52) | 0.89 (0.72-1.10) | 1 (Ref.) | 1.03 (0.87-1.22) | 0.97 (0.82-1.13) | 1.16 (0.99-1.38) |
| Yes | 1.19 (0.80-1.77) | 1.38 (0.97-1.95) | 1 (Ref.) | 0.95 (0.66-1.37) | 0.97 (0.70-1.35) | 0.99 (0.71-1.39) |

---

Dementia was ascertained by an expert adjudication panel at scheduled visits, telephone or informant interviews, or ICD-9 codes.

All models were adjusted for age, gender, race-center, education, APOE e4 status. No interaction term was tested for alcohol use and diabetes with aspartate aminotransferase categories.

\* Statistically significance at P<0.05

**Supplemental Table 3**

**Hazard ratios (95% confidence interval) of incident dementia by categories of alanine aminotransferase and aspartate aminotransferase measured at Atherosclerosis Risk in Communities (ARIC) Study Visit 4 (N=9,460, fasting for 8 hours and more)**

| <b>Alanine aminotransferase (U/L)</b> |                               |                                   |                             |                             |                             |                           |
|---------------------------------------|-------------------------------|-----------------------------------|-----------------------------|-----------------------------|-----------------------------|---------------------------|
|                                       | <b>10th percentile (5-10)</b> | <b>10-20th percentile (11-12)</b> | <b>2nd quintile (13-14)</b> | <b>3rd quintile (15-17)</b> | <b>4th quintile (18-22)</b> | <b>5th quintile (≥23)</b> |
|                                       | N=604                         | N=1227                            | N=1587                      | N=2177                      | N=1888                      | N=2157                    |
| <b>Model 1</b>                        | 1.34 (1.08-1.67)*             | 1.17 (0.99-1.40)                  | 1 (Ref.)                    | 1.05 (0.90-1.22)            | 1.12 (0.96-1.31)            | 1.18 (1.01-1.38)*         |
| <b>Model 2</b>                        | 1.31 (1.05-1.63)*             | 1.15 (0.97-1.37)                  | 1 (Ref.)                    | 1.03 (0.88-1.20)            | 1.08 (0.92-1.26)            | 1.11 (0.95-1.30)          |
| <b>Model 3</b>                        | 1.30 (1.04-1.62)*             | 1.13 (0.95-1.35)                  | 1 (Ref.)                    | 1.03 (0.89-1.20)            | 1.08 (0.93-1.27)            | 1.13 (0.96-1.32)          |

  

| <b>Aspartate aminotransferase (U/L)</b> |                               |                                   |                             |                             |                             |                           |
|-----------------------------------------|-------------------------------|-----------------------------------|-----------------------------|-----------------------------|-----------------------------|---------------------------|
|                                         | <b>10th percentile (8-15)</b> | <b>10-20th percentile (16-17)</b> | <b>2nd quintile (18-19)</b> | <b>3rd quintile (20-21)</b> | <b>4th quintile (22-26)</b> | <b>5th quintile (≥27)</b> |
|                                         | N=614                         | N=1157                            | N=1705                      | N=1805                      | N=2430                      | N=1929                    |
| <b>Model 1</b>                          | 1.23 (0.98-1.53)              | 1.01 (0.84-1.22)                  | 1 (Ref.)                    | 1.02 (0.88-1.20)            | 0.95 (0.82-1.10)            | 1.14 (0.98-1.33)          |
| <b>Model 2</b>                          | 1.17 (0.94-1.46)              | 0.99 (0.83-1.20)                  | 1 (Ref.)                    | 1.03 (0.88-1.20)            | 0.95 (0.82-1.10)            | 1.13 (0.97-1.32)          |
| <b>Model 3</b>                          | 1.16 (0.93-1.45)              | 0.99 (0.82-1.19)                  | 1 (Ref.)                    | 1.04 (0.89-1.21)            | 0.96 (0.83-1.11)            | 1.16 (0.99-1.35)          |

Dementia was ascertained by an expert adjudication panel at scheduled visits, telephone or informant interviews, or ICD-9 codes

Model 1 (Primary model): age, gender, race-center, education, APOE e4 status

Model 2: + alcohol use, diabetes

Model 3: + smoking, body mass index, systolic blood pressure, total cholesterol, high-density lipoprotein cholesterol

\* Statistically significance at  $P < 0.05$



**Supplemental Table 4**

**Hazard ratios (95% confidence interval) of incident dementia by categories of alanine aminotransferase and aspartate aminotransferase measured at Atherosclerosis Risk in Communities (ARIC) Study Visit 4 accounting for alcohol use and body weight (N=10,100)**

|                | <b>Alanine aminotransferase (U/L)</b> |                                   |                             |                             |                             |                           |
|----------------|---------------------------------------|-----------------------------------|-----------------------------|-----------------------------|-----------------------------|---------------------------|
|                | <b>10th percentile (5-10)</b>         | <b>10-20th percentile (11-12)</b> | <b>2nd quintile (13-14)</b> | <b>3rd quintile (15-17)</b> | <b>4th quintile (18-22)</b> | <b>5th quintile (≥23)</b> |
|                | N=644                                 | N=1281                            | N=1649                      | N=2279                      | N=1981                      | N=2266                    |
| <b>Model 1</b> | 1.34 (1.08-1.65)*                     | 1.16 (0.98-1.38)                  | 1 (Ref.)                    | 1.05 (0.91-1.22)            | 1.15 (0.98-1.34)            | 1.19 (1.02-1.39)*         |
| <b>Model 2</b> | 1.32 (1.06-1.64)*                     | 1.15 (0.97-1.37)                  | 1 (Ref.)                    | 1.05 (0.90-1.21)            | 1.15 (0.98-1.34)            | 1.20 (1.03-1.41)*         |
| <b>Model 3</b> | 1.34 (1.08-1.66)*                     | 1.17 (0.98-1.38)                  | 1 (Ref.)                    | 1.05 (0.90-1.21)            | 1.14 (0.97-1.32)            | 1.17 (1.00-1.36)*         |
| <b>Model 4</b> | 1.34 (1.08-1.65)*                     | 1.16 (0.98-1.38)                  | 1 (Ref.)                    | 1.05 (0.90-1.22)            | 1.14 (0.98-1.33)            | 1.18 (1.01-1.38)*         |

  

|                | <b>Aspartate aminotransferase (U/L)</b> |                                   |                             |                             |                             |                           |
|----------------|-----------------------------------------|-----------------------------------|-----------------------------|-----------------------------|-----------------------------|---------------------------|
|                | <b>10th percentile (8-15)</b>           | <b>10-20th percentile (16-17)</b> | <b>2nd quintile (18-19)</b> | <b>3rd quintile (20-21)</b> | <b>4th quintile (22-26)</b> | <b>5th quintile (≥27)</b> |
|                | N=672                                   | N=1230                            | N=1784                      | N=1874                      | N=2519                      | N=2021                    |
| <b>Model 1</b> | 1.22 (0.99-1.51)                        | 1.04 (0.87-1.24)                  | 1 (Ref.)                    | 1.01 (0.87-1.17)            | 0.96 (0.83-1.11)            | 1.13 (0.97-1.31)          |
| <b>Model 2</b> | 1.23 (1.00-1.53)                        | 1.05 (0.87-1.25)                  | 1 (Ref.)                    | 1.01 (0.87-1.17)            | 0.96 (0.83-1.11)            | 1.15 (0.99-1.34)          |
| <b>Model 3</b> | 1.22 (0.98-1.51)                        | 1.04 (0.87-1.25)                  | 1 (Ref.)                    | 1.01 (0.87-1.18)            | 0.96 (0.83-1.10)            | 1.12 (0.96-1.30)          |
| <b>Model 4</b> | 1.22 (0.98-1.51)                        | 1.04 (0.87-1.24)                  | 1 (Ref.)                    | 1.01 (0.87-1.17)            | 0.96 (0.83-1.11)            | 1.12 (0.97-1.31)          |

Dementia was ascertained by an expert adjudication panel at scheduled visits, telephone or informant interviews, or ICD-9 codes

Model 1 (Primary model): age, gender, race-center, education, APOE e4 status

Model 2: Model 1 + alcohol use, total weekly alcohol consumption, years since stop drinking, cumulative drinking years before stop drinking, and total weekly alcohol consumption before stop drinking

Model 3: Model 1 + body mass index category

Model 4: Model 1 + body mass index

\* Statistically significance at  $P < 0.05$

**Supplemental Table 5**

**Hazard ratios (95% confidence interval) of incident dementia by categories of alanine aminotransferase and aspartate aminotransferase measured at Atherosclerosis Risk in Communities (ARIC) Study Visit 4 (N=10,883, including 783 individuals with AST:ALT ratio  $\geq 2$ )**

| <b>Alanine aminotransferase (U/L)</b> |                               |                                   |                             |                             |                             |                                            |
|---------------------------------------|-------------------------------|-----------------------------------|-----------------------------|-----------------------------|-----------------------------|--------------------------------------------|
|                                       | <b>10th percentile (4-10)</b> | <b>10-20th percentile (11-12)</b> | <b>2nd quintile (13-14)</b> | <b>3rd quintile (15-17)</b> | <b>4th quintile (18-22)</b> | <b>5th quintile (<math>\geq 23</math>)</b> |
|                                       | N=639                         | N=1132                            | N=2492                      | N=1636                      | N=2684                      | N=2300                                     |
| <b>Model 1</b>                        | 1.39 (1.15-1.67)*             | 1.15 (0.98-1.35)                  | 1 (Ref.)                    | 0.98 (0.85-1.13)            | 1.09 (0.96-1.23)            | 1.14 (0.99-1.31)                           |
| <b>Model 2</b>                        | 1.38 (1.14-1.67)*             | 1.14 (0.97-1.34)                  | 1 (Ref.)                    | 0.97 (0.84-1.12)            | 1.04 (0.92-1.18)            | 1.07 (0.94-1.23)                           |
| <b>Model 3</b>                        | 1.38 (1.14-1.67)*             | 1.15 (0.97-1.35)                  | 1 (Ref.)                    | 0.98 (0.85-1.13)            | 1.06 (0.93-1.20)            | 1.10 (0.95-1.26)                           |

  

| <b>Aspartate aminotransferase (U/L)</b> |                               |                                   |                             |                             |                             |                                            |
|-----------------------------------------|-------------------------------|-----------------------------------|-----------------------------|-----------------------------|-----------------------------|--------------------------------------------|
|                                         | <b>10th percentile (8-15)</b> | <b>10-20th percentile (16-17)</b> | <b>2nd quintile (18-19)</b> | <b>3rd quintile (20-21)</b> | <b>4th quintile (22-26)</b> | <b>5th quintile (<math>\geq 27</math>)</b> |
|                                         | N=711                         | N=1319                            | N=1913                      | N=2000                      | N=2685                      | N=2255                                     |
| <b>Model 1</b>                          | 1.18 (0.96-1.45)              | 1.07 (0.90-1.27)                  | 1 (Ref.)                    | 1.02 (0.88-1.17)            | 0.96 (0.84-1.10)            | 1.16 (1.00-1.33)*                          |
| <b>Model 2</b>                          | 1.11 (0.90-1.37)              | 1.04 (0.88-1.24)                  | 1 (Ref.)                    | 1.02 (0.88-1.18)            | 0.96 (0.84-1.10)            | 1.16 (1.00-1.33)*                          |
| <b>Model 3</b>                          | 1.10 (0.89-1.36)              | 1.04 (0.88-1.23)                  | 1 (Ref.)                    | 1.03 (0.89-1.19)            | 0.97 (0.84-1.11)            | 1.18 (1.03-1.36)*                          |

Dementia was ascertained by an expert adjudication panel at scheduled visits, telephone or informant interviews, or ICD-9 codes

Model 1 (Primary model): age, gender, race-center, education, APOE e4 status

Model 2: + alcohol use, diabetes

Model 3: + smoking, body mass index, systolic blood pressure, total cholesterol, high-density lipoprotein cholesterol

\* Statistically significance at  $P < 0.05$

**Supplemental Table 6**

**Hazard ratios (95% confidence interval) of level 1 dementia by categories of alanine aminotransferase and aspartate aminotransferase measured at Atherosclerosis Risk in Communities**

**(ARIC) Study Visit 4 (N=5,384, separate stabilized weights for death and non-death drop-out)**

| <b>Alanine aminotransferase (U/L)</b> |                               |                                   |                             |                             |                             |                           |
|---------------------------------------|-------------------------------|-----------------------------------|-----------------------------|-----------------------------|-----------------------------|---------------------------|
|                                       | <b>10th percentile (5-10)</b> | <b>10-20th percentile (11-12)</b> | <b>2nd quintile (13-14)</b> | <b>3rd quintile (15-17)</b> | <b>4th quintile (18-22)</b> | <b>5th quintile (≥23)</b> |
|                                       | N=306                         | N=673                             | N=895                       | N=1246                      | N=1094                      | N=1260                    |
| <b>Model 1</b>                        | 2.01 (0.97-4.18)              | 1.24 (0.71-2.18)                  | 1 (Ref.)                    | 1.38 (0.77-2.46)            | 1.44 (0.78-2.68)            | 1.08 (0.58-1.99)          |
| <b>Model 2</b>                        | 2.13 (1.12-4.03)*             | 1.39 (0.76-2.55)                  | 1 (Ref.)                    | 1.43 (0.79-2.60)            | 1.42 (0.78-2.57)            | 1.06 (0.57-1.98)          |
| <b>Model 3</b>                        | 2.12 (1.18-3.78)*             | 1.36 (0.72-2.58)                  | 1 (Ref.)                    | 1.48 (0.84-2.61)            | 1.37 (0.80-2.35)            | 1.07 (0.60-1.93)          |

  

| <b>Aspartate aminotransferase (U/L)</b> |                               |                                   |                             |                             |                             |                           |
|-----------------------------------------|-------------------------------|-----------------------------------|-----------------------------|-----------------------------|-----------------------------|---------------------------|
|                                         | <b>10th percentile (8-15)</b> | <b>10-20th percentile (16-17)</b> | <b>2nd quintile (18-19)</b> | <b>3rd quintile (20-21)</b> | <b>4th quintile (22-26)</b> | <b>5th quintile (≥27)</b> |
|                                         | N=301                         | N=650                             | N=989                       | N=1029                      | N=1425                      | N=1080                    |
| <b>Model 1</b>                          | 0.85 (0.43-1.69)              | 0.79 (0.41-1.53)                  | 1 (Ref.)                    | 0.72 (0.37-1.39)            | 0.53 (0.29-0.97)*           | 0.60 (0.31-1.15)          |
| <b>Model 2</b>                          | 0.78 (0.39-1.55)              | 0.84 (0.52-1.36)                  | 1 (Ref.)                    | 0.83 (0.47-1.44)            | 0.56 (0.33-0.93)*           | 0.64 (0.39-1.05)          |
| <b>Model 3</b>                          | 0.73 (0.37-1.47)              | 0.83 (0.52-1.34)                  | 1 (Ref.)                    | 0.86 (0.50-1.47)            | 0.61 (0.38-0.96)*           | 0.69 (0.43-1.10)          |

Level 1 dementia was ascertained by an expert adjudication panel at scheduled visits

Variables included to estimate the probability of death and non-death drop-out: age, gender, race-center, education, APOE e4 status, alcohol use, diabetes, smoking, body mass index, blood

pressure, total cholesterol, high-density lipoprotein cholesterol, suspect dementia status, global cognition factor score, comorbidity (coronary heart disease, heart failure, stroke), auxiliary variables from annual follow-up interviews (an indicator of a report by proxy, self-reported poor health, number of hospitalizations), and interactions between variables.

Model 1 (Primary model): age, gender, race-center, education, APOE e4 status

Model 2: + alcohol use, diabetes

Model 3: + smoking, body mass index, systolic blood pressure, total cholesterol, high-density lipoprotein cholesterol

\* Statistically significance at  $P < 0.05$
